# Supplementary material for: Host Adaptive Evolution of Avian-Origin H3N2 Canine Influenza Virus
Source: Front Microbiol. 2021 Jun 14;12:655228. doi: 10.3389/fmicb.2021.655228 (PMC8236823; doi:10.3389/fmicb.2021.655228)
Supplement: Supplementary Table 2 — Strain name, collection date, digital date, location, base composition and CAI values for 220 completely sequenced H3N2 CIV genomes. [file Table_2.XLSX]

## Sheet: H3N2CIV Composition
Strain Name	Collection Date	Digital Date	Location	GC1	GC2	GC3	TT	TC	TA	TG	CT	CC	CA	CG	AT	AC	AA	AG	GT	GC	GA	GG	CAI-Dog	CAI-Duck		Mean CAI value
A/Canis_lupus_familiaris/USA/006974/2018	01/17/2018	2018.05	USA	0.435	0.432	0.481	0.928	0.88	0.64	1.152	0.816	0.72	1.408	0.368	1.184	1.008	1.744	1.264	0.656	0.704	1.424	1.056	0.744	0.82	CAI-Dog	0.742636 ± 0.000894
A/Canis_lupus_familiaris/USA/007781/2018	01/17/2018	2018.05	USA	0.436	0.431	0.481	0.928	0.896	0.624	1.152	0.816	0.736	1.408	0.384	1.184	1.024	1.744	1.264	0.656	0.704	1.424	1.056	0.744	0.82	CAI-Duck	0.818464 ± 0.000953
A/Canis_lupus_familiaris/USA/152386/2018	08/23/2018	2018.64	USA	0.435	0.432	0.479	0.944	0.88	0.64	1.152	0.8	0.72	1.376	0.384	1.184	0.992	1.76	1.28	0.688	0.688	1.456	1.072	0.745	0.821
A/Canis_lupus_familiaris/USA/188203/2017	10/31/2017	2017.83	USA	0.436	0.432	0.478	0.944	0.896	0.64	1.152	0.816	0.736	1.392	0.384	1.2	1.008	1.744	1.264	0.672	0.688	1.44	1.04	0.743	0.819
A/Canis_lupus_familiaris/USA/188226/2017	10/31/2017	2017.83	USA	0.435	0.432	0.478	0.944	0.896	0.64	1.152	0.832	0.736	1.376	0.384	1.184	0.992	1.744	1.264	0.672	0.704	1.44	1.04	0.743	0.82
A/Canis_lupus_familiaris/USA/188297/2017	10/31/2017	2017.83	USA	0.436	0.432	0.479	0.944	0.896	0.64	1.152	0.816	0.72	1.392	0.384	1.184	0.992	1.744	1.28	0.672	0.704	1.44	1.056	0.743	0.82
A/Canis_lupus_familiaris/USA/188305/2017	10/31/2017	2017.83	USA	0.437	0.433	0.479	0.928	0.88	0.64	1.152	0.816	0.736	1.408	0.384	1.184	1.008	1.744	1.28	0.672	0.704	1.44	1.056	0.743	0.819
A/Canis_lupus_familiaris/USA/218592/2017	12/30/2017	2018	USA	0.435	0.433	0.481	0.944	0.896	0.64	1.152	0.816	0.72	1.392	0.384	1.2	1.008	1.744	1.28	0.656	0.704	1.44	1.056	0.743	0.819
A/canine/Beijing/20121215-34/2012	12/15/2012	2012.96	China	0.436	0.434	0.48	0.928	0.896	0.624	1.152	0.816	0.704	1.392	0.4	1.2	0.992	1.744	1.264	0.656	0.72	1.44	1.056	0.741	0.817
A/canine/Beijing/20121230-62/2012	12/30/2012	2013	China	0.436	0.434	0.481	0.928	0.896	0.624	1.152	0.832	0.704	1.392	0.4	1.2	0.992	1.744	1.264	0.64	0.72	1.44	1.056	0.742	0.818
A/canine/Beijing/20131112-279/2013	11/12/2013	2013.87	China	0.436	0.433	0.48	0.928	0.896	0.624	1.168	0.816	0.704	1.392	0.384	1.2	0.992	1.744	1.264	0.656	0.72	1.44	1.056	0.742	0.818
A/canine/Beijing/20131203-342/2013	12/03/2013	2013.92	China	0.436	0.433	0.48	0.944	0.896	0.624	1.168	0.816	0.704	1.392	0.384	1.2	0.992	1.744	1.264	0.656	0.72	1.456	1.056	0.742	0.818
A/canine/Beijing/20131204-349/2013	12/04/2013	2013.93	China	0.435	0.433	0.479	0.944	0.896	0.624	1.152	0.816	0.704	1.376	0.4	1.2	0.992	1.744	1.28	0.656	0.72	1.456	1.056	0.741	0.818
A/canine/Beijing/20131207-365/2013	12/07/2013	2013.93	China	0.436	0.433	0.481	0.944	0.88	0.624	1.168	0.816	0.72	1.392	0.4	1.2	0.992	1.744	1.264	0.656	0.72	1.44	1.056	0.742	0.818
A/canine/Beijing/20140103-90/2014	01/03/2014	2014.01	China	0.436	0.433	0.48	0.944	0.896	0.624	1.168	0.816	0.704	1.392	0.384	1.2	0.992	1.76	1.264	0.656	0.72	1.44	1.056	0.742	0.818
A/canine/Beijing/20140110-2/2014	01/10/2014	2014.03	China	0.436	0.432	0.481	0.928	0.88	0.624	1.168	0.816	0.72	1.392	0.384	1.2	0.992	1.76	1.264	0.656	0.72	1.44	1.056	0.742	0.818
A/canine/Beijing/20150118-256/2015	01/18/2015	2015.05	China	0.435	0.431	0.478	0.96	0.896	0.64	1.152	0.832	0.704	1.376	0.4	1.2	0.992	1.728	1.264	0.64	0.72	1.44	1.04	0.741	0.818
A/canine/Beijing/20150120-265/2015	01/20/2015	2015.05	China	0.435	0.431	0.48	0.944	0.896	0.624	1.152	0.816	0.72	1.392	0.4	1.2	0.992	1.776	1.248	0.64	0.72	1.44	1.04	0.742	0.818
A/canine/Beijing/20150122-284/2015	01/22/2015	2015.06	China	0.436	0.429	0.48	0.944	0.896	0.624	1.152	0.816	0.72	1.408	0.384	1.2	0.992	1.776	1.248	0.64	0.72	1.424	1.056	0.742	0.818
A/canine/Beijing/20161216-8/2016	12/16/2016	2016.96	China	0.436	0.432	0.48	0.928	0.896	0.624	1.152	0.816	0.736	1.408	0.384	1.184	1.008	1.744	1.28	0.672	0.704	1.44	1.056	0.743	0.819
A/canine/Beijing/20161228-9/2016	12/28/2016	2016.99	China	0.436	0.431	0.48	0.928	0.896	0.624	1.152	0.832	0.736	1.408	0.368	1.184	1.008	1.744	1.264	0.672	0.704	1.44	1.056	0.743	0.819
A/canine/Beijing/20170314-73/2017	03/14/2017	2017.2	China	0.436	0.432	0.48	0.928	0.896	0.624	1.152	0.816	0.736	1.392	0.384	1.184	1.008	1.744	1.264	0.672	0.704	1.44	1.056	0.743	0.819
A/canine/Beijing/20170417-81/2017	04/17/2017	2017.29	China	0.436	0.432	0.48	0.928	0.88	0.624	1.152	0.816	0.736	1.408	0.384	1.184	1.024	1.744	1.264	0.672	0.688	1.44	1.056	0.743	0.819
A/canine/Beijing/20170417-83/2017	04/17/2017	2017.29	China	0.436	0.432	0.479	0.928	0.896	0.624	1.152	0.816	0.736	1.408	0.384	1.184	1.008	1.744	1.264	0.672	0.704	1.44	1.056	0.743	0.819
A/canine/Beijing/20170510-118/2017	05/10/2017	2017.36	China	0.436	0.432	0.48	0.928	0.88	0.64	1.152	0.816	0.736	1.392	0.384	1.184	1.008	1.76	1.28	0.656	0.704	1.44	1.056	0.743	0.818
A/canine/Beijing/20170512-120/2017	05/12/2017	2017.36	China	0.436	0.432	0.48	0.928	0.896	0.624	1.152	0.832	0.736	1.392	0.384	1.184	1.008	1.744	1.264	0.672	0.704	1.424	1.056	0.742	0.819
A/canine/Beijing/20170512-133/2017	05/12/2017	2017.36	China	0.436	0.432	0.479	0.928	0.896	0.64	1.152	0.816	0.736	1.392	0.384	1.184	1.008	1.744	1.28	0.672	0.704	1.44	1.056	0.742	0.818
A/canine/Beijing/20170512-137/2017	05/12/2017	2017.36	China	0.435	0.433	0.479	0.928	0.896	0.64	1.152	0.816	0.736	1.392	0.384	1.184	1.008	1.744	1.264	0.672	0.704	1.44	1.056	0.742	0.818
A/canine/Beijing/20170527-146/2017	05/27/2017	2017.4	China	0.436	0.432	0.481	0.928	0.896	0.624	1.152	0.832	0.736	1.408	0.384	1.184	1.008	1.744	1.264	0.672	0.704	1.44	1.056	0.743	0.819
A/canine/Beijing/20170528-147/2017	05/28/2017	2017.41	China	0.436	0.432	0.481	0.928	0.896	0.624	1.152	0.832	0.736	1.408	0.384	1.184	1.008	1.744	1.264	0.672	0.704	1.44	1.056	0.743	0.819
A/canine/Beijing/20170528-148/2017	05/28/2017	2017.41	China	0.435	0.432	0.48	0.928	0.896	0.624	1.152	0.816	0.736	1.408	0.384	1.184	1.008	1.744	1.264	0.672	0.704	1.424	1.056	0.743	0.819
A/canine/Beijing/20170604-164/2017	06/04/2017	2017.42	China	0.436	0.433	0.48	0.928	0.896	0.64	1.152	0.832	0.736	1.392	0.384	1.184	1.008	1.744	1.264	0.672	0.704	1.44	1.056	0.743	0.819
A/canine/Beijing/20170610-173/2017	06/10/2017	2017.44	China	0.436	0.432	0.479	0.928	0.896	0.624	1.152	0.816	0.736	1.408	0.384	1.184	1.024	1.744	1.264	0.672	0.688	1.44	1.056	0.743	0.819
A/canine/Beijing/20170610-174/2017	06/10/2017	2017.44	China	0.436	0.432	0.479	0.928	0.896	0.624	1.152	0.816	0.736	1.408	0.384	1.184	1.024	1.744	1.264	0.672	0.688	1.44	1.056	0.743	0.819
A/canine/Beijing/20170612-183/2017	06/12/2017	2017.45	China	0.435	0.432	0.48	0.928	0.896	0.64	1.152	0.816	0.736	1.392	0.384	1.184	1.008	1.744	1.264	0.656	0.704	1.44	1.056	0.743	0.819
A/canine/Beijing/20170614-185/2017	06/14/2017	2017.45	China	0.436	0.432	0.479	0.928	0.896	0.64	1.152	0.816	0.736	1.392	0.384	1.184	1.024	1.76	1.264	0.672	0.688	1.44	1.056	0.743	0.819
A/canine/Beijing/20170616-202/2017	06/16/2017	2017.46	China	0.436	0.432	0.48	0.928	0.896	0.64	1.152	0.816	0.736	1.392	0.384	1.184	1.008	1.744	1.28	0.672	0.704	1.44	1.056	0.743	0.819
A/canine/Beijing/20170618-206/2017	06/18/2017	2017.46	China	0.436	0.432	0.479	0.928	0.896	0.64	1.152	0.816	0.736	1.408	0.384	1.184	1.024	1.76	1.264	0.672	0.688	1.44	1.056	0.743	0.819
A/canine/Beijing/20170709-15/2017	07/09/2017	2017.52	China	0.437	0.432	0.48	0.928	0.88	0.624	1.152	0.816	0.736	1.408	0.368	1.184	1.008	1.744	1.28	0.672	0.704	1.44	1.04	0.743	0.819
A/canine/Beijing/20170711-16/2017	07/11/2017	2017.53	China	0.436	0.431	0.48	0.928	0.896	0.64	1.152	0.816	0.736	1.408	0.368	1.184	1.008	1.744	1.28	0.672	0.704	1.44	1.056	0.742	0.818
A/canine/Beijing/20170712-18/2017	07/12/2017	2017.53	China	0.435	0.432	0.479	0.928	0.896	0.64	1.152	0.832	0.736	1.392	0.384	1.184	1.008	1.744	1.264	0.672	0.704	1.44	1.056	0.743	0.819
A/canine/Beijing/20170720-30/2017	07/20/2017	2017.55	China	0.436	0.432	0.48	0.928	0.896	0.624	1.152	0.816	0.736	1.392	0.384	1.184	1.008	1.744	1.28	0.656	0.704	1.44	1.056	0.743	0.819
A/canine/Beijing/362/2009	12/17/2009	2019.96	China	0.439	0.441	0.485	0.912	0.896	0.608	1.152	0.816	0.72	1.376	0.416	1.184	0.976	1.68	1.28	0.656	0.72	1.472	1.088	0.743	0.819
A/canine/California/043670/2017	03/24/2017	2017.23	USA	0.434	0.432	0.478	0.944	0.896	0.624	1.152	0.816	0.704	1.392	0.384	1.216	0.992	1.76	1.248	0.656	0.72	1.44	1.056	0.742	0.819
A/canine/California/84315/2017	05/18/2017	2017.38	USA	0.436	0.43	0.48	0.928	0.896	0.624	1.152	0.816	0.736	1.392	0.384	1.184	1.008	1.76	1.264	0.672	0.704	1.44	1.056	0.743	0.819
A/canine/California/BRW002/2018	01/06/2018	2018.02	USA	0.436	0.432	0.481	0.928	0.896	0.624	1.152	0.832	0.72	1.408	0.384	1.2	1.008	1.744	1.264	0.656	0.704	1.424	1.056	0.744	0.819
A/canine/China/JLM1/2015	11/25/2015	2015.9	China	0.435	0.431	0.476	0.96	0.896	0.64	1.152	0.832	0.704	1.392	0.384	1.216	0.992	1.76	1.264	0.64	0.72	1.44	1.024	0.741	0.818
A/canine/China/JLM2/2015	11/25/2015	2015.9	China	0.435	0.431	0.475	0.96	0.896	0.64	1.152	0.832	0.704	1.376	0.4	1.216	0.992	1.76	1.264	0.64	0.72	1.44	1.024	0.741	0.818
A/canine/China/LG1/2015	12/16/2015	2015.96	China	0.434	0.433	0.476	0.944	0.896	0.64	1.168	0.832	0.688	1.376	0.4	1.216	0.992	1.744	1.264	0.656	0.72	1.456	1.04	0.74	0.817
A/canine/China/LG2/2015	12/16/2015	2015.96	China	0.435	0.435	0.476	0.928	0.896	0.64	1.168	0.832	0.704	1.376	0.4	1.2	0.992	1.744	1.264	0.656	0.72	1.456	1.024	0.74	0.817
A/canine/China/Shanghai-0315-2019/2019	03/08/2019	2019.18	China	0.435	0.431	0.479	0.928	0.88	0.624	1.152	0.816	0.736	1.392	0.384	1.2	1.024	1.776	1.264	0.656	0.688	1.44	1.04	0.744	0.82
A/canine/Florida/269770/2015	2015	2015.5	USA	0.437	0.431	0.483	0.928	0.896	0.624	1.152	0.816	0.72	1.408	0.384	1.2	1.008	1.728	1.28	0.656	0.704	1.44	1.056	0.742	0.818
A/canine/Florida/88807.2/2017	05/25/2017	2017.4	USA	0.436	0.432	0.48	0.928	0.896	0.624	1.152	0.832	0.736	1.408	0.384	1.184	1.008	1.744	1.264	0.672	0.704	1.44	1.056	0.743	0.819
A/canine/Georgia/42632/2015	06/12/2015	2015.45	USA	0.436	0.431	0.483	0.928	0.896	0.624	1.152	0.816	0.72	1.408	0.384	1.2	1.008	1.728	1.28	0.656	0.704	1.44	1.056	0.742	0.818
A/canine/Georgia/95391/2015	07/13/2015	2015.53	USA	0.436	0.432	0.483	0.928	0.896	0.624	1.152	0.816	0.72	1.408	0.384	1.184	1.008	1.744	1.28	0.656	0.704	1.44	1.056	0.742	0.817
A/canine/Guangdong/01/2013	04/01/2013	2013.25	China	0.439	0.439	0.484	0.928	0.896	0.608	1.152	0.816	0.72	1.376	0.416	1.2	0.992	1.696	1.28	0.656	0.72	1.456	1.088	0.742	0.818
A/canine/Guangdong/01/2014	02/01/2014	2014.09	China	0.438	0.44	0.483	0.928	0.896	0.624	1.152	0.816	0.72	1.376	0.416	1.2	0.992	1.696	1.28	0.656	0.72	1.472	1.088	0.742	0.817
A/canine/Guangdong/02/2014	02/01/2014	2014.09	China	0.437	0.44	0.483	0.928	0.896	0.624	1.152	0.816	0.72	1.376	0.416	1.2	0.992	1.696	1.28	0.656	0.72	1.472	1.072	0.742	0.818
A/canine/Guangdong/03/2013	11/01/2013	2013.84	China	0.438	0.439	0.483	0.928	0.896	0.608	1.152	0.816	0.704	1.376	0.4	1.2	0.976	1.696	1.28	0.656	0.72	1.472	1.088	0.742	0.818
A/canine/Guangdong/04/2013	11/01/2013	2013.84	China	0.437	0.438	0.482	0.928	0.896	0.624	1.152	0.816	0.704	1.376	0.416	1.184	0.992	1.696	1.296	0.672	0.72	1.472	1.072	0.742	0.818
A/canine/Guangdong/05/2011	02/01/2011	2011.09	China	0.439	0.44	0.483	0.928	0.896	0.608	1.152	0.816	0.72	1.376	0.416	1.184	0.992	1.696	1.28	0.672	0.72	1.456	1.072	0.742	0.818
A/canine/Guangdong/1/2006	06/01/2006	2016.42	China	0.439	0.443	0.486	0.928	0.912	0.592	1.168	0.816	0.72	1.376	0.4	1.184	0.96	1.68	1.296	0.672	0.72	1.456	1.104	0.743	0.819
A/canine/Guangdong/1/2007	04/18/2007	2017.3	China	0.439	0.445	0.484	0.928	0.896	0.608	1.168	0.816	0.72	1.376	0.416	1.168	0.976	1.68	1.28	0.672	0.736	1.456	1.088	0.741	0.817
A/canine/Guangdong/1/2011	02/01/2011	2011.09	China	0.438	0.441	0.483	0.928	0.896	0.608	1.152	0.816	0.72	1.376	0.416	1.184	0.992	1.68	1.28	0.672	0.72	1.456	1.072	0.743	0.819
A/canine/Guangdong/12/2012	09/15/2012	2012.71	China	0.435	0.434	0.484	0.928	0.896	0.624	1.152	0.816	0.704	1.392	0.4	1.2	0.992	1.728	1.264	0.656	0.736	1.44	1.072	0.743	0.819
A/canine/Guangdong/2/2006	08/01/2006	2016.58	China	0.439	0.444	0.484	0.928	0.912	0.608	1.152	0.816	0.72	1.376	0.416	1.184	0.976	1.68	1.28	0.672	0.72	1.456	1.088	0.742	0.817
A/canine/Guangdong/2/2007	10/18/2007	2017.8	China	0.44	0.447	0.485	0.928	0.896	0.592	1.168	0.816	0.72	1.376	0.432	1.168	0.976	1.664	1.28	0.672	0.736	1.456	1.104	0.742	0.818
A/canine/Guangdong/2/2011	02/01/2011	2011.09	China	0.439	0.44	0.484	0.928	0.896	0.608	1.152	0.816	0.72	1.376	0.416	1.184	0.992	1.68	1.28	0.656	0.736	1.472	1.072	0.742	0.818
A/canine/Guangdong/23/2012	09/18/2012	2012.72	China	0.436	0.433	0.483	0.928	0.896	0.624	1.152	0.816	0.72	1.376	0.4	1.2	0.992	1.744	1.264	0.656	0.72	1.44	1.072	0.743	0.819
A/canine/Guangdong/3/2011	03/01/2011	2011.16	China	0.437	0.441	0.483	0.928	0.896	0.624	1.152	0.816	0.72	1.376	0.416	1.184	0.976	1.68	1.28	0.672	0.72	1.472	1.072	0.742	0.818
A/canine/Guangxi/L1/2013	05/01/2013	2013.33	China	0.437	0.431	0.476	0.992	0.88	0.608	1.168	0.8	0.72	1.392	0.368	1.216	0.96	1.792	1.248	0.656	0.72	1.424	1.088	0.74	0.816
A/canine/Guangxi/L2/2013	05/01/2013	2013.33	China	0.436	0.431	0.475	0.992	0.88	0.608	1.168	0.8	0.704	1.392	0.368	1.216	0.96	1.792	1.248	0.656	0.704	1.424	1.088	0.739	0.815
A/canine/Guangxi/LZ45/2015	01/22/2015	2015.06	China	0.436	0.434	0.471	0.96	0.896	0.608	1.152	0.8	0.72	1.408	0.368	1.216	0.944	1.776	1.296	0.656	0.736	1.424	1.056	0.743	0.821
A/canine/Heilongjiang/L1/2013	03/10/2013	2013.19	China	0.438	0.438	0.484	0.928	0.896	0.624	1.152	0.816	0.72	1.392	0.4	1.184	0.992	1.68	1.28	0.656	0.72	1.456	1.088	0.743	0.819
A/canine/Illinois/077752/2016	2016	2016.5	USA	0.435	0.432	0.483	0.928	0.896	0.624	1.152	0.832	0.72	1.392	0.384	1.2	1.008	1.744	1.264	0.656	0.704	1.44	1.056	0.743	0.818
A/canine/Illinois/077753/2016	2016	2016.5	USA	0.435	0.432	0.483	0.928	0.896	0.624	1.152	0.832	0.72	1.392	0.384	1.2	1.008	1.728	1.264	0.656	0.704	1.44	1.056	0.743	0.818
A/canine/Illinois/0843093/2015	03/30/2015	2015.24	USA	0.436	0.433	0.483	0.928	0.896	0.624	1.152	0.816	0.72	1.392	0.384	1.184	1.008	1.728	1.28	0.656	0.704	1.44	1.056	0.743	0.818
A/canine/Illinois/091375-16-1-1/2016	2016	2016.5	USA	0.436	0.43	0.482	0.928	0.896	0.624	1.152	0.832	0.72	1.408	0.384	1.184	1.008	1.76	1.264	0.656	0.704	1.44	1.056	0.742	0.817
A/canine/Illinois/12191/2015	04/15/2015	2015.29	USA	0.437	0.432	0.483	0.928	0.896	0.624	1.152	0.816	0.72	1.392	0.384	1.184	1.008	1.728	1.28	0.656	0.704	1.44	1.056	0.743	0.818
A/canine/Illinois/145135-16-3-1/2016	2016	2016.5	USA	0.436	0.431	0.482	0.928	0.896	0.624	1.152	0.832	0.72	1.408	0.384	1.184	1.008	1.76	1.264	0.656	0.704	1.44	1.056	0.742	0.817
A/canine/Illinois/1619144/2015	04/14/2015	2015.28	USA	0.436	0.432	0.483	0.928	0.896	0.624	1.152	0.816	0.72	1.392	0.384	1.184	1.008	1.728	1.28	0.656	0.704	1.44	1.056	0.743	0.818
A/canine/Illinois/187427-16-7/2016	2016	2016.5	USA	0.436	0.43	0.482	0.928	0.896	0.624	1.152	0.832	0.72	1.408	0.384	1.184	1.008	1.76	1.264	0.656	0.704	1.44	1.056	0.742	0.817
A/canine/Illinois/20170110-1G4/2016	2016	2016.5	USA	0.436	0.431	0.482	0.928	0.896	0.624	1.152	0.816	0.72	1.392	0.384	1.184	1.008	1.744	1.264	0.656	0.704	1.44	1.056	0.742	0.817
A/canine/Illinois/20170110-2F1/2016	2016	2016.5	USA	0.436	0.429	0.481	0.928	0.896	0.624	1.136	0.816	0.72	1.408	0.384	1.184	1.008	1.76	1.28	0.656	0.704	1.44	1.04	0.742	0.817
A/canine/Illinois/20170110-2G1/2016	2016	2016.5	USA	0.436	0.429	0.481	0.928	0.896	0.624	1.152	0.832	0.72	1.408	0.384	1.184	1.008	1.76	1.28	0.656	0.704	1.44	1.056	0.741	0.817
A/canine/Illinois/283066/2015	2016	2016.5	USA	0.435	0.432	0.483	0.912	0.896	0.64	1.152	0.832	0.72	1.392	0.384	1.2	1.008	1.728	1.28	0.656	0.704	1.44	1.056	0.742	0.818
A/canine/Illinois/328292/2015	2016	2016.5	USA	0.436	0.431	0.483	0.928	0.896	0.624	1.152	0.832	0.72	1.392	0.384	1.2	1.008	1.728	1.264	0.656	0.704	1.44	1.056	0.743	0.818
A/canine/Illinois/41915/2015	2016	2016.5	USA	0.436	0.432	0.483	0.928	0.896	0.624	1.152	0.816	0.72	1.392	0.384	1.184	1.008	1.728	1.28	0.656	0.704	1.44	1.056	0.742	0.818
A/canine/Illinois/A37/2017	11/01/2017	2017.84	USA	0.436	0.432	0.478	0.928	0.896	0.624	1.152	0.832	0.736	1.392	0.384	1.184	1.008	1.744	1.264	0.656	0.704	1.44	1.04	0.743	0.819
A/canine/Illinois/I0182389/2015	2016	2016.5	USA	0.436	0.432	0.483	0.928	0.896	0.624	1.152	0.816	0.72	1.392	0.384	1.184	1.008	1.728	1.28	0.656	0.704	1.44	1.056	0.743	0.818
A/canine/Illinois/M16-25374-19-1/2016	2016	2016.5	USA	0.435	0.431	0.483	0.928	0.896	0.624	1.152	0.832	0.72	1.408	0.384	1.2	1.008	1.744	1.264	0.656	0.704	1.44	1.056	0.743	0.819
A/canine/Illinois/M17-05782-1-1/2017	2017	2017.5	USA	0.435	0.43	0.481	0.928	0.896	0.64	1.152	0.832	0.72	1.408	0.384	1.184	1.024	1.76	1.264	0.656	0.704	1.44	1.056	0.741	0.817
A/canine/Indiana/003018/2016	2016	2016.5	USA	0.436	0.432	0.483	0.928	0.896	0.624	1.152	0.832	0.72	1.392	0.384	1.2	1.008	1.728	1.264	0.656	0.704	1.44	1.056	0.743	0.818
A/canine/Indiana/1177-17-1/2017	2017	2017.5	USA	0.435	0.43	0.481	0.928	0.896	0.624	1.152	0.832	0.72	1.408	0.384	1.184	1.008	1.76	1.264	0.656	0.704	1.44	1.056	0.741	0.817
A/canine/Indiana/132276-16-1-2/2016	2016	2016.5	USA	0.436	0.431	0.482	0.928	0.896	0.624	1.152	0.816	0.72	1.408	0.384	1.184	1.008	1.744	1.264	0.656	0.704	1.44	1.056	0.741	0.817
A/canine/Indiana/17031-16-2/2016	2016	2016.5	USA	0.437	0.43	0.482	0.928	0.896	0.64	1.152	0.832	0.72	1.408	0.384	1.184	1.008	1.744	1.264	0.656	0.704	1.44	1.056	0.741	0.816
A/canine/Indiana/2093681/2015	2015	2015.5	USA	0.436	0.432	0.483	0.928	0.896	0.624	1.152	0.816	0.72	1.392	0.384	1.184	1.008	1.728	1.28	0.656	0.704	1.44	1.056	0.743	0.818
A/canine/Indiana/96198/2015	07/02/2015	2015.5	USA	0.436	0.432	0.483	0.912	0.896	0.624	1.152	0.816	0.72	1.392	0.384	1.184	1.008	1.744	1.28	0.656	0.704	1.44	1.056	0.743	0.818
A/canine/Jiangsu/01/2009	12/01/2009	2019.92	China	0.437	0.44	0.485	0.928	0.896	0.624	1.152	0.816	0.72	1.376	0.416	1.184	0.992	1.712	1.28	0.656	0.72	1.456	1.088	0.743	0.818
A/canine/Jiangsu/02/2010	03/01/2010	2010.16	China	0.438	0.44	0.485	0.928	0.896	0.608	1.152	0.816	0.72	1.376	0.416	1.184	0.992	1.712	1.28	0.672	0.72	1.456	1.088	0.743	0.818
A/canine/Jiangsu/03/2010	04/01/2010	2010.25	China	0.437	0.441	0.485	0.912	0.896	0.608	1.152	0.816	0.72	1.376	0.416	1.184	0.992	1.696	1.28	0.672	0.72	1.456	1.072	0.743	0.819
A/canine/Jiangsu/04/2010	05/01/2010	2010.33	China	0.438	0.44	0.484	0.928	0.896	0.608	1.152	0.816	0.72	1.376	0.416	1.184	0.992	1.696	1.28	0.672	0.72	1.456	1.072	0.743	0.819
A/canine/Jiangsu/05/2010	05/01/2010	2010.33	China	0.438	0.44	0.484	0.928	0.896	0.624	1.152	0.816	0.72	1.376	0.416	1.184	0.992	1.696	1.28	0.672	0.72	1.456	1.072	0.743	0.818
A/canine/Jiangsu/06/2010	06/01/2010	2010.42	China	0.439	0.438	0.483	0.928	0.896	0.608	1.152	0.816	0.72	1.376	0.4	1.184	0.992	1.712	1.28	0.656	0.72	1.456	1.072	0.743	0.818
A/canine/Korea/01/2007	05/01/2007	2017.33	South_Korea	0.438	0.446	0.487	0.928	0.896	0.608	1.168	0.816	0.72	1.376	0.416	1.184	0.96	1.648	1.296	0.688	0.72	1.472	1.104	0.744	0.819
A/canine/Korea/0589318/2015	03/05/2015	2015.18	USA	0.436	0.432	0.482	0.928	0.896	0.64	1.152	0.816	0.72	1.392	0.384	1.184	1.008	1.728	1.28	0.672	0.704	1.44	1.056	0.742	0.818
A/canine/Korea/AS-01/2009	09/18/2009	2019.72	South_Korea	0.439	0.441	0.483	0.928	0.896	0.608	1.152	0.816	0.72	1.376	0.416	1.168	0.992	1.68	1.296	0.672	0.72	1.456	1.072	0.742	0.818
A/canine/Korea/AS-03/2012	05/10/2012	2012.36	South_Korea	0.436	0.438	0.483	0.928	0.896	0.608	1.168	0.816	0.72	1.392	0.384	1.184	0.992	1.696	1.28	0.672	0.704	1.472	1.072	0.744	0.82
A/canine/Korea/AS-05/2012	07/14/2012	2012.53	South_Korea	0.437	0.438	0.483	0.928	0.896	0.624	1.152	0.832	0.72	1.376	0.4	1.184	1.008	1.696	1.28	0.672	0.72	1.456	1.056	0.743	0.819
A/canine/Korea/AS-11/2013	06/08/2013	2013.44	South_Korea	0.435	0.435	0.482	0.928	0.896	0.624	1.168	0.816	0.72	1.392	0.384	1.184	0.992	1.728	1.264	0.672	0.704	1.456	1.072	0.743	0.819
A/canine/Korea/BD-1/2013	05/30/2013	2013.41	South_Korea	0.437	0.436	0.483	0.928	0.896	0.624	1.152	0.832	0.72	1.392	0.4	1.184	1.008	1.712	1.28	0.656	0.704	1.456	1.056	0.743	0.819
A/canine/Korea/CY009/2010	10/01/2010	2010.75	South_Korea	0.439	0.439	0.485	0.928	0.896	0.608	1.152	0.816	0.72	1.376	0.416	1.168	0.992	1.68	1.28	0.672	0.736	1.456	1.088	0.743	0.818
A/canine/Korea/CY053/2014	03/02/2014	2014.17	South_Korea	0.438	0.438	0.484	0.928	0.896	0.624	1.152	0.816	0.72	1.376	0.4	1.184	0.976	1.696	1.296	0.672	0.72	1.456	1.072	0.743	0.818
A/canine/Korea/DG1/2014	02/13/2014	2014.12	South_Korea	0.439	0.437	0.481	0.928	0.896	0.624	1.152	0.832	0.736	1.392	0.4	1.184	1.008	1.696	1.28	0.656	0.72	1.456	1.056	0.743	0.82
A/canine/Korea/GCVP01/2007	05/01/2007	2017.33	South_Korea	0.438	0.447	0.487	0.928	0.912	0.608	1.168	0.816	0.72	1.376	0.416	1.184	0.96	1.648	1.296	0.688	0.72	1.472	1.104	0.744	0.818
A/canine/Korea/KRIBB01/2011	11/01/2011	2011.84	South_Korea	0.437	0.439	0.484	0.928	0.896	0.608	1.168	0.816	0.72	1.376	0.4	1.184	0.992	1.68	1.28	0.672	0.72	1.456	1.072	0.743	0.819
A/canine/Korea/MV1/2012	11/07/2012	2012.85	South_Korea	0.438	0.446	0.481	0.928	0.912	0.608	1.168	0.816	0.704	1.376	0.4	1.184	0.976	1.648	1.296	0.672	0.72	1.472	1.088	0.742	0.818
A/canine/Korea/S1/2012	11/05/2012	2012.85	South_Korea	0.437	0.44	0.482	0.928	0.896	0.624	1.152	0.816	0.72	1.376	0.416	1.184	0.992	1.696	1.28	0.672	0.72	1.456	1.072	0.742	0.818
A/canine/Korea/VC123578/2012	03/13/2012	2012.2	South_Korea	0.439	0.441	0.477	0.96	0.88	0.608	1.168	0.816	0.704	1.392	0.368	1.2	0.96	1.68	1.312	0.656	0.736	1.456	1.088	0.745	0.823
A/canine/Liaoning/27/2012	04/11/2012	2012.28	China	0.438	0.436	0.481	0.944	0.896	0.624	1.152	0.8	0.72	1.392	0.4	1.2	0.992	1.712	1.28	0.656	0.72	1.456	1.072	0.743	0.818
A/canine/Minnesota/139684/2017	08/10/2017	2017.61	USA	0.436	0.432	0.479	0.928	0.896	0.624	1.152	0.832	0.736	1.392	0.384	1.184	1.008	1.744	1.264	0.656	0.704	1.44	1.056	0.742	0.819
A/canine/Nanjing/20170328-7/2017	03/28/2017	2017.24	China	0.436	0.432	0.479	0.928	0.896	0.64	1.152	0.816	0.736	1.408	0.384	1.184	1.024	1.744	1.264	0.672	0.688	1.44	1.056	0.741	0.817
A/canine/Nanjing/20170419-12/2017	04/19/2017	2017.3	China	0.436	0.432	0.479	0.928	0.896	0.64	1.152	0.832	0.736	1.408	0.384	1.184	1.024	1.744	1.264	0.672	0.688	1.44	1.056	0.743	0.819
A/canine/Nanjing/20170515-25/2017	05/15/2017	2017.37	China	0.436	0.432	0.48	0.928	0.896	0.64	1.152	0.816	0.736	1.408	0.384	1.184	1.008	1.744	1.264	0.672	0.704	1.424	1.056	0.743	0.819
A/canine/Nanjing/20170607-40/2017	06/07/2017	2017.43	China	0.436	0.432	0.481	0.928	0.88	0.64	1.152	0.816	0.736	1.408	0.384	1.184	1.024	1.744	1.264	0.672	0.704	1.44	1.056	0.743	0.819
A/canine/Nanjing/20170620-47/2017	06/20/2017	2017.47	China	0.436	0.432	0.48	0.928	0.896	0.64	1.152	0.832	0.736	1.408	0.384	1.184	1.024	1.744	1.264	0.672	0.688	1.44	1.056	0.743	0.819
A/canine/Nanjing/20170704-53/2017	07/04/2017	2017.51	China	0.436	0.432	0.48	0.928	0.896	0.624	1.152	0.832	0.736	1.408	0.384	1.184	1.008	1.744	1.264	0.672	0.704	1.44	1.056	0.743	0.819
A/canine/Nevada/BRW018/2018	03/01/2018	2018.16	USA	0.436	0.432	0.481	0.928	0.896	0.624	1.152	0.832	0.72	1.408	0.384	1.2	1.008	1.744	1.264	0.656	0.704	1.424	1.056	0.743	0.819
A/canine/New_York/CRP034/2018	05/07/2018	2018.35	USA	0.436	0.431	0.481	0.928	0.896	0.624	1.152	0.832	0.736	1.408	0.384	1.2	1.008	1.744	1.248	0.656	0.704	1.424	1.056	0.744	0.82
A/canine/North_Carolina/109904/2015	07/29/2015	2015.58	USA	0.436	0.432	0.482	0.928	0.896	0.64	1.152	0.816	0.72	1.408	0.384	1.2	1.008	1.728	1.28	0.656	0.704	1.44	1.056	0.742	0.818
A/canine/Ohio/174509/2017	10/08/2017	2017.77	USA	0.436	0.432	0.479	0.928	0.896	0.624	1.152	0.832	0.736	1.392	0.384	1.184	1.008	1.744	1.264	0.672	0.704	1.44	1.056	0.743	0.82
A/canine/Ohio/188191/2017	10/31/2017	2017.83	USA	0.436	0.432	0.478	0.944	0.88	0.624	1.152	0.816	0.736	1.392	0.384	1.184	0.992	1.744	1.28	0.672	0.704	1.44	1.056	0.743	0.819
A/canine/Ohio/A82/2017	10/28/2017	2017.82	USA	0.436	0.432	0.478	0.928	0.896	0.624	1.152	0.832	0.736	1.392	0.384	1.184	1.008	1.744	1.264	0.672	0.704	1.44	1.04	0.743	0.819
A/canine/Ohio/A91/2017	10/28/2017	2017.82	USA	0.436	0.432	0.479	0.928	0.896	0.624	1.152	0.832	0.736	1.392	0.384	1.184	1.008	1.744	1.264	0.672	0.704	1.44	1.056	0.743	0.819
A/canine/Ontario/NCFAD-2018-001-4/2018	01/05/2018	2018.01	Canada	0.436	0.432	0.481	0.928	0.896	0.624	1.152	0.832	0.72	1.408	0.384	1.2	1.008	1.744	1.264	0.656	0.704	1.424	1.056	0.744	0.819
A/canine/Ontario/NCFAD-2018-064-1/2018	10/15/2018	2018.79	Canada	0.436	0.429	0.479	0.928	0.896	0.624	1.152	0.816	0.72	1.408	0.368	1.184	1.008	1.776	1.264	0.656	0.704	1.44	1.04	0.743	0.819
A/canine/Ontario/NCFAD-2018-069-1/2018	10/22/2018	2018.81	Canada	0.436	0.429	0.479	0.928	0.896	0.64	1.152	0.816	0.72	1.408	0.368	1.184	1.008	1.776	1.264	0.656	0.688	1.44	1.04	0.743	0.819
A/canine/Ontario/NCFAD-2018-069-10/2018	10/18/2018	2018.8	Canada	0.436	0.429	0.478	0.928	0.896	0.64	1.152	0.816	0.72	1.408	0.368	1.184	1.008	1.776	1.264	0.656	0.688	1.44	1.04	0.743	0.819
A/canine/Ontario/NCFAD-2018-070-12/2018	03/13/2018	2018.2	Canada	0.436	0.43	0.48	0.928	0.88	0.64	1.152	0.816	0.736	1.408	0.368	1.2	1.008	1.76	1.264	0.656	0.704	1.44	1.056	0.743	0.819
A/canine/Ontario/NCFAD-2018-070-7/2018	03/02/2018	2018.17	Canada	0.436	0.43	0.481	0.928	0.88	0.64	1.152	0.816	0.736	1.408	0.368	1.2	1.008	1.76	1.264	0.656	0.704	1.44	1.056	0.744	0.819
A/canine/Shanghai/20170622-7/2017	06/22/2017	2017.47	China	0.436	0.432	0.481	0.928	0.896	0.64	1.152	0.816	0.736	1.392	0.384	1.184	1.008	1.744	1.264	0.672	0.704	1.44	1.056	0.743	0.819
A/canine/Shanghai/20170713-18/2017	07/13/2017	2017.53	China	0.436	0.432	0.48	0.928	0.896	0.64	1.152	0.816	0.72	1.408	0.384	1.184	1.008	1.744	1.264	0.672	0.704	1.44	1.056	0.743	0.819
A/canine/Shanghai/20170721-36/2017	07/21/2017	2017.55	China	0.436	0.431	0.478	0.928	0.896	0.624	1.152	0.816	0.736	1.392	0.384	1.184	1.008	1.76	1.264	0.672	0.688	1.44	1.056	0.742	0.818
A/canine/South_Korea/0173915/2015	2015	2015.5	South_Korea	0.435	0.431	0.482	0.928	0.896	0.64	1.152	0.816	0.72	1.392	0.384	1.2	1.008	1.728	1.28	0.656	0.704	1.44	1.056	0.742	0.817
A/canine/South_Korea/20170110-1F1/2016	2016	2016.5	South_Korea	0.437	0.433	0.481	0.928	0.88	0.624	1.152	0.816	0.736	1.392	0.4	1.184	1.008	1.728	1.28	0.656	0.72	1.44	1.056	0.742	0.818
A/canine/Texas/343907/2015	12/22/2015	2015.98	USA	0.436	0.432	0.483	0.928	0.896	0.624	1.152	0.832	0.72	1.392	0.384	1.2	1.008	1.728	1.264	0.656	0.704	1.44	1.056	0.743	0.818
A/canine/Wisconsin/19137/2016	02/08/2016	2016.11	USA	0.434	0.431	0.483	0.912	0.896	0.624	1.152	0.832	0.72	1.392	0.384	1.2	1.008	1.744	1.264	0.656	0.704	1.44	1.056	0.743	0.818
A/canine/Xian/20170601-159/2017	06/01/2017	2017.42	China	0.436	0.433	0.48	0.928	0.896	0.624	1.152	0.816	0.736	1.392	0.384	1.184	1.008	1.744	1.264	0.672	0.704	1.44	1.056	0.742	0.818
A/canine/Zhejiang/1/2010	09/30/2010	2010.75	China	0.438	0.44	0.484	0.928	0.896	0.608	1.168	0.816	0.72	1.376	0.4	1.184	0.992	1.696	1.28	0.672	0.72	1.456	1.072	0.743	0.818
A/canine/Indiana/093165-16-1-1/2016	2016	2016.5	USA	0.436	0.43	0.482	0.928	0.896	0.624	1.152	0.832	0.72	1.408	0.384	1.184	1.008	1.76	1.264	0.656	0.704	1.44	1.056	0.742	0.817
A/canine/Florida/090919/2017	05/26/2017	2017.4	USA	0.436	0.432	0.48	0.928	0.896	0.624	1.152	0.832	0.736	1.408	0.384	1.184	1.008	1.744	1.264	0.672	0.704	1.44	1.056	0.743	0.819
A/canine/Illinois/20170110-1A4/2016	2016	2016.5	USA	0.436	0.431	0.482	0.928	0.896	0.624	1.152	0.816	0.72	1.408	0.384	1.184	1.008	1.744	1.264	0.656	0.704	1.44	1.056	0.742	0.817
A/canine/Texas/2100186/2015	2015	2015.5	USA	0.436	0.433	0.483	0.928	0.896	0.624	1.152	0.816	0.72	1.392	0.384	1.184	1.008	1.728	1.28	0.656	0.704	1.44	1.056	0.743	0.818
A/canine/Pennsylvania/0261885/2015	2015	2015.5	USA	0.436	0.432	0.483	0.928	0.896	0.624	1.152	0.816	0.72	1.392	0.384	1.184	1.008	1.728	1.28	0.656	0.704	1.44	1.056	0.743	0.818
A/canine/North_Carolina/103297/2015	2015	2015.5	USA	0.436	0.432	0.482	0.928	0.896	0.624	1.152	0.816	0.72	1.408	0.384	1.2	1.008	1.728	1.28	0.656	0.704	1.44	1.056	0.742	0.817
A/canine/Illinois/278597/2016	2016	2016.5	USA	0.435	0.432	0.483	0.912	0.896	0.64	1.152	0.832	0.72	1.392	0.384	1.2	1.008	1.728	1.28	0.656	0.704	1.44	1.056	0.742	0.818
A/canine/North_Carolina/090487/2017	05/26/2017	2017.4	USA	0.436	0.432	0.48	0.928	0.896	0.624	1.152	0.832	0.736	1.408	0.384	1.184	1.008	1.744	1.264	0.672	0.704	1.44	1.056	0.743	0.819
A/canine/Kentucky/174490/2017	10/09/2017	2017.77	USA	0.436	0.432	0.479	0.928	0.896	0.624	1.152	0.832	0.736	1.392	0.384	1.184	1.008	1.744	1.264	0.672	0.704	1.44	1.056	0.743	0.819
A/canine/Kentucky/128656/2017	07/26/2017	2017.57	USA	0.436	0.432	0.479	0.928	0.896	0.624	1.152	0.832	0.736	1.392	0.384	1.184	1.008	1.744	1.264	0.672	0.704	1.44	1.056	0.743	0.819
A/canine/Indiana/130636/2017	07/29/2017	2017.58	USA	0.436	0.432	0.479	0.928	0.896	0.624	1.152	0.832	0.736	1.392	0.384	1.184	1.008	1.744	1.264	0.672	0.704	1.44	1.056	0.743	0.819
A/canine/South_Carolina/132956/2017	08/01/2017	2017.58	USA	0.436	0.432	0.479	0.928	0.896	0.624	1.152	0.832	0.736	1.408	0.384	1.184	1.008	1.744	1.264	0.672	0.704	1.44	1.056	0.743	0.819
A/canine/Ohio/A97/2017	10/28/2017	2017.82	USA	0.436	0.432	0.479	0.928	0.896	0.624	1.152	0.832	0.736	1.392	0.384	1.184	1.008	1.744	1.264	0.672	0.704	1.44	1.056	0.743	0.819
A/canine/Georgia/89750.1/2017	05/26/2017	2017.4	USA	0.436	0.432	0.48	0.928	0.896	0.624	1.152	0.832	0.736	1.408	0.384	1.184	1.008	1.744	1.264	0.672	0.704	1.44	1.056	0.743	0.819
A/canine/Georgia/20170606-19/2017	05/25/2017	2017.4	USA	0.436	0.432	0.48	0.928	0.896	0.624	1.152	0.832	0.736	1.408	0.384	1.184	1.008	1.744	1.264	0.672	0.704	1.44	1.056	0.743	0.819
A/canine/Florida/20170606-17/2017	2017	2017.5	USA	0.436	0.433	0.48	0.928	0.896	0.624	1.152	0.832	0.736	1.408	0.384	1.184	1.008	1.744	1.264	0.672	0.704	1.44	1.056	0.743	0.819
A/canine/Pennsylvania/20170411-5/2017	2017	2017.5	USA	0.435	0.43	0.481	0.928	0.896	0.624	1.152	0.832	0.72	1.408	0.384	1.184	1.008	1.76	1.264	0.656	0.704	1.44	1.056	0.741	0.817
A/canine/Kentucky/20170606-6/2017	2017	2017.5	USA	0.436	0.432	0.48	0.928	0.896	0.624	1.152	0.832	0.736	1.408	0.384	1.184	1.008	1.744	1.264	0.672	0.704	1.44	1.056	0.743	0.819
A/canine/Florida/20170606-11/2017	2017	2017.5	USA	0.436	0.432	0.48	0.928	0.896	0.624	1.152	0.832	0.736	1.408	0.384	1.184	1.008	1.744	1.264	0.672	0.704	1.44	1.056	0.743	0.819
A/canine/California/20170411-20/2017	2017	2017.5	USA	0.434	0.432	0.478	0.944	0.896	0.624	1.152	0.816	0.704	1.392	0.384	1.216	0.992	1.76	1.248	0.656	0.72	1.44	1.056	0.742	0.819
A/canine/NorthCarolina/20170606-28/2017	2017	2017.5	USA	0.436	0.432	0.48	0.928	0.896	0.624	1.152	0.832	0.736	1.408	0.384	1.184	1.008	1.744	1.264	0.672	0.704	1.44	1.056	0.743	0.819
A/canine/Illinois/M17-05782-11-1/2017	2017	2017.5	USA	0.435	0.43	0.481	0.928	0.896	0.64	1.152	0.832	0.72	1.408	0.384	1.184	1.024	1.76	1.264	0.656	0.704	1.44	1.056	0.741	0.817
A/canine/Florida/20170606-7/2017	2017	2017.5	USA	0.436	0.432	0.48	0.928	0.896	0.624	1.152	0.832	0.736	1.408	0.384	1.184	1.008	1.744	1.264	0.672	0.704	1.44	1.056	0.743	0.819
A/canine/Illinois/M17-05782-7-1/2017	2017	2017.5	USA	0.435	0.43	0.481	0.928	0.896	0.64	1.152	0.832	0.72	1.408	0.384	1.184	1.024	1.76	1.264	0.656	0.704	1.44	1.04	0.741	0.817
A/canine/Illinois/M17-05782-4-1/2017	2017	2017.5	USA	0.435	0.43	0.481	0.928	0.896	0.64	1.152	0.832	0.72	1.408	0.384	1.184	1.024	1.76	1.264	0.656	0.704	1.44	1.056	0.741	0.817
A/canine/Florida/20170606-9/2017	2017	2017.5	USA	0.436	0.432	0.48	0.928	0.896	0.624	1.152	0.832	0.736	1.408	0.384	1.184	1.008	1.744	1.264	0.672	0.704	1.44	1.056	0.743	0.819
A/canine/Illinois/M17-05782-8-1/2017	2017	2017.5	USA	0.436	0.43	0.481	0.928	0.896	0.624	1.152	0.832	0.72	1.408	0.384	1.184	1.024	1.76	1.264	0.656	0.704	1.44	1.056	0.741	0.817
A/canine/Florida/20170606-2/2017	2017	2017.5	USA	0.436	0.432	0.48	0.928	0.896	0.624	1.152	0.832	0.736	1.408	0.384	1.184	1.008	1.744	1.264	0.672	0.704	1.44	1.056	0.743	0.819
A/canine/Florida/20170606-8/2017	2017	2017.5	USA	0.436	0.432	0.48	0.928	0.896	0.624	1.152	0.832	0.736	1.408	0.384	1.184	1.008	1.744	1.264	0.672	0.704	1.44	1.056	0.743	0.819
A/canine/Kentucky/20170606-23/2017	2017	2017.5	USA	0.436	0.432	0.48	0.928	0.896	0.624	1.152	0.832	0.736	1.408	0.384	1.184	1.008	1.744	1.264	0.672	0.704	1.44	1.056	0.743	0.819
A/canine/Illinois/M16-16391-2-1/2016	2016	2016.5	USA	0.435	0.43	0.481	0.928	0.896	0.624	1.152	0.832	0.72	1.408	0.384	1.184	1.008	1.76	1.264	0.656	0.704	1.44	1.056	0.741	0.817
A/canine/Illinois/M16-30480-3-1/2016	2016	2016.5	USA	0.436	0.43	0.482	0.928	0.896	0.624	1.152	0.832	0.72	1.408	0.384	1.184	1.008	1.76	1.264	0.656	0.704	1.44	1.056	0.742	0.817
A/canine/Illinois/20170110-1G12/2016	2016	2016.5	USA	0.436	0.431	0.482	0.928	0.896	0.624	1.152	0.816	0.72	1.408	0.384	1.184	1.008	1.744	1.264	0.656	0.704	1.44	1.056	0.742	0.817
A/canine/Florida/20170606-18/2017	2017	2017.5	USA	0.436	0.432	0.48	0.928	0.896	0.624	1.152	0.832	0.736	1.408	0.384	1.184	1.008	1.744	1.264	0.672	0.704	1.44	1.056	0.743	0.819
A/canine/Illinois/M16-25374-14-1/2016	2016	2016.5	USA	0.435	0.43	0.481	0.928	0.896	0.64	1.152	0.832	0.72	1.408	0.384	1.184	1.024	1.76	1.264	0.656	0.704	1.44	1.056	0.741	0.817
A/canine/Georgia/104940/2015	07/17/2015	2015.54	USA	0.436	0.432	0.483	0.928	0.896	0.624	1.152	0.816	0.72	1.408	0.384	1.184	1.008	1.728	1.28	0.656	0.704	1.44	1.056	0.742	0.817
A/canine/Illinois/2883703/2015	05/07/2015	2015.35	USA	0.436	0.433	0.483	0.928	0.896	0.624	1.152	0.816	0.72	1.392	0.384	1.184	1.008	1.728	1.28	0.656	0.704	1.44	1.056	0.743	0.818
A/canine/Korea/VC378/2012	03/13/2012	2012.2	Korea	0.438	0.451	0.48	0.928	0.912	0.608	1.184	0.848	0.704	1.36	0.416	1.184	0.976	1.616	1.296	0.672	0.736	1.488	1.088	0.743	0.819
A/canine/Ontario/NCFAD-2018-070-9/2018	03/02/2018	2018.17	Canada	0.436	0.43	0.481	0.928	0.88	0.64	1.152	0.816	0.736	1.408	0.368	1.2	1.008	1.76	1.264	0.656	0.704	1.44	1.056	0.744	0.819
A/canine/Ontario/NCFAD-2018-070-8/2018	03/02/2018	2018.17	Canada	0.436	0.43	0.481	0.928	0.88	0.64	1.152	0.816	0.736	1.408	0.368	1.2	1.008	1.76	1.264	0.656	0.704	1.44	1.056	0.744	0.819
A/canine/Ontario/NCFAD-2018-070-5/2018	02/01/2018	2018.09	Canada	0.435	0.432	0.481	0.928	0.896	0.624	1.152	0.832	0.72	1.408	0.384	1.2	1.008	1.744	1.264	0.656	0.704	1.424	1.056	0.744	0.819
A/canine/Ontario/NCFAD-2018-070-4/2018	01/26/2018	2018.07	Canada	0.435	0.432	0.481	0.928	0.896	0.624	1.152	0.832	0.72	1.408	0.384	1.2	1.008	1.744	1.264	0.656	0.704	1.424	1.056	0.744	0.819
A/canine/Ontario/NCFAD-2018-070-3/2018	01/13/2018	2018.04	Canada	0.435	0.432	0.481	0.928	0.896	0.624	1.152	0.832	0.72	1.408	0.384	1.2	1.008	1.744	1.264	0.656	0.704	1.424	1.056	0.744	0.819
A/canine/Ontario/NCFAD-2018-070-2/2018	01/09/2018	2018.02	Canada	0.436	0.432	0.481	0.928	0.896	0.624	1.152	0.832	0.72	1.408	0.384	1.2	1.008	1.744	1.264	0.656	0.704	1.424	1.056	0.744	0.819
A/canine/Ontario/NCFAD-2018-070-16/2018	03/26/2018	2018.23	Canada	0.436	0.43	0.48	0.928	0.88	0.64	1.152	0.816	0.736	1.408	0.368	1.2	1.008	1.76	1.264	0.656	0.704	1.44	1.056	0.743	0.819
A/canine/Ontario/NCFAD-2018-070-15/2018	03/14/2018	2018.2	Canada	0.436	0.43	0.48	0.928	0.88	0.64	1.152	0.816	0.736	1.408	0.368	1.2	1.008	1.76	1.264	0.656	0.704	1.44	1.056	0.743	0.819
A/canine/Ontario/NCFAD-2018-070-14/2018	03/14/2018	2018.2	Canada	0.436	0.43	0.48	0.928	0.88	0.64	1.152	0.816	0.736	1.408	0.368	1.2	1.008	1.76	1.264	0.656	0.704	1.44	1.056	0.743	0.819
A/canine/Ontario/NCFAD-2018-070-13/2018	03/13/2018	2018.2	Canada	0.436	0.43	0.48	0.928	0.88	0.64	1.152	0.816	0.736	1.408	0.368	1.2	1.008	1.76	1.264	0.656	0.704	1.44	1.056	0.743	0.819
A/canine/Ontario/NCFAD-2018-070-11/2018	03/09/2018	2018.19	Canada	0.436	0.43	0.48	0.928	0.88	0.64	1.152	0.816	0.736	1.408	0.368	1.2	1.008	1.76	1.264	0.656	0.704	1.44	1.04	0.744	0.819
A/canine/Ontario/NCFAD-2018-070-10/2018	03/09/2018	2018.19	Canada	0.436	0.43	0.48	0.928	0.88	0.64	1.152	0.816	0.736	1.408	0.368	1.2	1.008	1.76	1.264	0.656	0.704	1.44	1.04	0.744	0.819
A/canine/Ontario/NCFAD-2018-070-1/2018	01/09/2018	2018.02	Canada	0.436	0.432	0.481	0.928	0.896	0.624	1.152	0.832	0.72	1.408	0.384	1.2	1.008	1.744	1.264	0.656	0.704	1.424	1.056	0.744	0.819
A/canine/Ontario/NCFAD-2018-069-9/2018	10/24/2018	2018.81	Canada	0.436	0.429	0.479	0.928	0.896	0.64	1.152	0.816	0.72	1.408	0.368	1.184	1.008	1.776	1.264	0.656	0.688	1.44	1.04	0.743	0.819
A/canine/Ontario/NCFAD-2018-069-6/2018	10/22/2018	2018.81	Canada	0.436	0.429	0.479	0.928	0.896	0.64	1.152	0.816	0.72	1.392	0.384	1.184	1.008	1.776	1.264	0.656	0.688	1.44	1.04	0.743	0.819
A/canine/Guangdong/3/2018	05/17/2018	2018.38	China	0.435	0.431	0.479	0.928	0.896	0.624	1.152	0.816	0.736	1.392	0.384	1.2	1.008	1.76	1.248	0.672	0.688	1.424	1.056	0.743	0.819
A/canine/Guangdong/2/2018	05/16/2018	2018.37	China	0.435	0.43	0.479	0.928	0.896	0.624	1.152	0.816	0.736	1.408	0.384	1.184	1.008	1.76	1.264	0.672	0.704	1.44	1.056	0.744	0.82
A/canine/Guangdong/1/2018	05/14/2018	2018.37	China	0.434	0.43	0.479	0.928	0.896	0.624	1.152	0.816	0.72	1.408	0.368	1.184	1.008	1.76	1.264	0.672	0.688	1.44	1.04	0.743	0.82
A/canine/Beijing/20150124-300/2015	01/24/2015	2015.07	China	0.435	0.431	0.48	0.944	0.896	0.608	1.152	0.816	0.72	1.408	0.384	1.216	0.992	1.776	1.248	0.64	0.72	1.44	1.056	0.742	0.818
A/canine/Beijing/20170424-102/2017	04/24/2017	2017.31	China	0.436	0.433	0.48	0.928	0.896	0.624	1.152	0.816	0.736	1.392	0.384	1.184	1.008	1.744	1.264	0.672	0.704	1.44	1.056	0.743	0.819
A/canine/Beijing/20170501-108/2017	05/01/2017	2017.33	China	0.436	0.432	0.48	0.928	0.896	0.64	1.152	0.816	0.736	1.392	0.384	1.184	1.008	1.744	1.28	0.672	0.704	1.44	1.056	0.742	0.818
A/canine/Beijing/20170512-121/2017	05/12/2017	2017.36	China	0.437	0.432	0.48	0.928	0.896	0.624	1.152	0.816	0.736	1.392	0.384	1.184	1.008	1.744	1.264	0.672	0.704	1.44	1.056	0.743	0.819
A/canine/Beijing/20170512-122/2017	05/12/2017	2017.36	China	0.436	0.433	0.48	0.928	0.896	0.624	1.152	0.816	0.736	1.392	0.384	1.184	1.008	1.744	1.264	0.672	0.704	1.44	1.056	0.743	0.819
A/canine/Beijing/20170610-172/2017	06/10/2017	2017.44	China	0.436	0.432	0.479	0.928	0.896	0.624	1.152	0.816	0.736	1.408	0.384	1.184	1.024	1.744	1.264	0.672	0.688	1.44	1.056	0.743	0.819
A/canine/Beijing/20170615-195/2017	06/15/2017	2017.45	China	0.436	0.432	0.479	0.928	0.896	0.624	1.152	0.832	0.72	1.408	0.384	1.184	1.024	1.744	1.264	0.672	0.688	1.44	1.056	0.743	0.819
A/canine/Beijing/20170616-200/2017	06/16/2017	2017.46	China	0.436	0.432	0.479	0.928	0.896	0.624	1.152	0.816	0.736	1.408	0.384	1.184	1.024	1.76	1.264	0.672	0.688	1.44	1.056	0.743	0.819
A/canine/Beijing/20131203-341/2013	12/03/2013	2013.92	China	0.436	0.433	0.48	0.944	0.896	0.624	1.168	0.816	0.704	1.392	0.384	1.2	0.992	1.744	1.264	0.656	0.72	1.456	1.056	0.742	0.818
A/canine/Xian/20170601-157/2017	06/01/2017	2017.42	China	0.436	0.433	0.48	0.928	0.896	0.624	1.152	0.816	0.736	1.408	0.384	1.184	1.008	1.744	1.264	0.672	0.704	1.44	1.056	0.743	0.819
A/canine/New_Jersey/CRP036/2018	05/13/2018	2018.36	USA	0.436	0.431	0.481	0.928	0.896	0.624	1.152	0.832	0.736	1.408	0.384	1.2	1.008	1.76	1.248	0.656	0.704	1.424	1.056	0.744	0.82
A/canine/Nevada/BRW015/2018	02/07/2018	2018.1	USA	0.436	0.431	0.481	0.928	0.896	0.624	1.152	0.832	0.72	1.392	0.384	1.2	1.008	1.744	1.264	0.656	0.704	1.424	1.056	0.743	0.819
A/canine/California/BRW003/2018	2018	2018.5	USA	0.436	0.432	0.482	0.928	0.896	0.624	1.152	0.816	0.736	1.408	0.384	1.2	1.008	1.744	1.264	0.656	0.704	1.424	1.056	0.744	0.819
A/Canis_lupus_familiaris/USA/118191/2017	10/31/2017	2017.83	USA	0.436	0.432	0.478	0.928	0.896	0.624	1.152	0.832	0.736	1.392	0.384	1.184	1.008	1.744	1.264	0.672	0.704	1.44	1.04	0.743	0.819
A/canine/Georgia/101875/2015	2015	2015.5	USA	0.432	0.482	0.058	0.928	0.896	0.624	1.152	0.816	0.72	1.408	0.384	1.184	1.008	1.744	1.28	0.656	0.704	1.44	1.056	0.742	0.817
